# Supplementary material for: Alkali metal complexes of bis-o-xylyl-(17-crown-5): from a dinuclear monomer and a dinuclear polymer to sandwich polymer
Source: Royal Society of Chemistry journal article supplement (doi:10.1039/d0ce00864h), 2020-01-01
Supplement: d0ce00864h1.pdf [file d0ce00864h1.pdf]

# Electronic supplementary information

for

## Alkali metal complexes of bis-*o*-xylyl-(17-crown-5): from dinuclear monomer and dinuclear polymer to sandwich polymer

Seulgi Kim,<sup>a</sup> In-Hyeok Park,<sup>a,d</sup> Shim Sung Lee,<sup>\*a</sup> Wonbo Sim<sup>\*b</sup> and Jai Young Lee<sup>\*c</sup>

<sup>a</sup>*Department of Chemistry, Gyeongsang National University, Jinju 52828, South Korea*

<sup>b</sup>*Department of Chemistry, Konyang University, Nonsan 32992, South Korea*

<sup>c</sup>*Department of Disaster Safety & Fire Fighting, Konyang Cyber University, Daejeon 35365, South Korea*

<sup>d</sup>*Graduate School of Analytical Science and Technology (GRAST), Chungnam National University, Daejeon 34134, South Korea.*

**Table S1** Crystallographic data and refinement parameters of **1**, **2** and **3**

|                                                                                      | <b>1</b>                                                                       | <b>2</b>                                                         | <b>3</b>                                                                           |
|--------------------------------------------------------------------------------------|--------------------------------------------------------------------------------|------------------------------------------------------------------|------------------------------------------------------------------------------------|
| Formula                                                                              | C <sub>26</sub> H <sub>46</sub> I <sub>2</sub> Na <sub>2</sub> O <sub>12</sub> | C <sub>13</sub> H <sub>21</sub> F <sub>6</sub> KO <sub>5</sub> P | C <sub>13</sub> H <sub>21</sub> Cl <sub>0.5</sub> Cs <sub>0.5</sub> O <sub>5</sub> |
| Formula weight                                                                       | 850.41                                                                         | 441.37                                                           | 341.48                                                                             |
| Temperature                                                                          | 203                                                                            | 203                                                              | 203                                                                                |
| Crystal system                                                                       | Triclinic                                                                      | Monoclinic                                                       | Monoclinic                                                                         |
| Space group                                                                          | <i>P</i> -1                                                                    | <i>C</i> 2/ <i>c</i>                                             | <i>P</i> 2 <sub>1</sub> / <i>c</i>                                                 |
| <i>Z</i>                                                                             | 1                                                                              | 8                                                                | 4                                                                                  |
| <i>a</i> (Å)                                                                         | 8.4111(9)                                                                      | 14.8016(14)                                                      | 9.6204(4)                                                                          |
| <i>b</i> (Å)                                                                         | 10.3053(11)                                                                    | 15.8098(16)                                                      | 23.8722(11)                                                                        |
| <i>c</i> (Å)                                                                         | 11.1643(12)                                                                    | 16.8878(14)                                                      | 9.3051(4)                                                                          |
| $\alpha$ (°)                                                                         | 67.827(2)                                                                      | 90                                                               | 90                                                                                 |
| $\beta$ (°)                                                                          | 85.400(3)                                                                      | 111.541(5)                                                       | 117.294(2)                                                                         |
| $\gamma$ (°)                                                                         | 79.241(3)                                                                      | 90                                                               | 90                                                                                 |
| <i>V</i> (Å <sup>3</sup> )                                                           | 880.34(16)                                                                     | 3675.9(6)                                                        | 1899.09(15)                                                                        |
| <i>D</i> <sub>calc</sub> (g/cm <sup>3</sup> )                                        | 1.604                                                                          | 1.595                                                            | 1.194                                                                              |
| 2 $\theta$ <sub>max</sub> (°)                                                        | 52.00                                                                          | 52.00                                                            | 52.00                                                                              |
| <i>R</i> <sub>1</sub> , <i>wR</i> <sub>2</sub> [ <i>I</i> > 2 $\sigma$ ( <i>I</i> )] | 0.0654, 0.2656                                                                 | 0.0623, 0.1662                                                   | 0.0725, 0.2103                                                                     |
| <i>R</i> <sub>1</sub> , <i>wR</i> <sub>2</sub> [all data]                            | 0.0671, 0.2666                                                                 | 0.0971, 0.1877                                                   | 0.0877, 0.2211                                                                     |
| No. of reflection used [>2 $\sigma$ ( <i>I</i> )]                                    | 3464 [ <i>R</i> <sub>int</sub> = 0.0348]                                       | 3622 [ <i>R</i> <sub>int</sub> = 0.0715]                         | 3730 [ <i>R</i> <sub>int</sub> = 0.0479]                                           |

**Table S2** Selected bond lengths (Å) and bond angles (°) for **1**

|            |          |            |           |
|------------|----------|------------|-----------|
| Na1-O1     | 2.384(9) | Na1-O4     | 2.437(9)  |
| Na1-O2     | 2.416(9) | Na1-O5     | 2.557(9)  |
| Na1-O3     | 2.479(9) | Na1-O1W    | 2.244(12) |
| O1-Na1-O2  | 69.1(3)  | O2-Na1-O3  | 68.1(3)   |
| O1-Na1-O3  | 132.0(3) | O2-Na1-O4  | 114.9(3)  |
| O1-Na1-O4  | 152.3(3) | O2-Na1-O5  | 118.1(3)  |
| O1-Na1-O5  | 84.5(3)  | O2-Na1-O1W | 69.1(3)   |
| O1-Na1-O1W | 95.3(4)  | O3-Na1-O4  | 68.9(3)   |
| O4-Na1-O5  | 69.3(3)  | O3-Na1-O5  | 135.2(3)  |
| O4-Na1-O1W | 97.7(5)  | O3-Na1-O1W | 101.2(4)  |
| O5-Na1-O1W | 99.3(4)  |            |           |

**Table S3** Selected bond lengths (Å) and bond angles (°) for **2**

|          |            |          |            |
|----------|------------|----------|------------|
| K1-O1    | 2.827(3)   | K1-O5    | 2.782(3)   |
| K1-O2    | 2.970(3)   | K1-F1    | 2.885(2)   |
| K1-O3    | 2.826(3)   | K1-F5    | 2.702(4)   |
| K1-O4    | 2.928(3)   |          |            |
| O1-K1-O2 | 58.94(8)   | O2-K1-O3 | 57.19(8)   |
| O1-K1-O3 | 116.10(9)  | O2-K1-O4 | 78.41(8)   |
| O1-K1-O4 | 105.51(8)  | O2-K1-O5 | 95.02(8)   |
| O1-K1-O5 | 68.41(9)   | O2-K1-F1 | 145.34(8)  |
| O1-K1-F1 | 136.24(9)  | O2-K1-F5 | 96.35(16)  |
| O1-K1-F5 | 67.79(16)  | O3-K1-O4 | 59.94(8)   |
| O4-K1-O5 | 57.39(8)   | O3-K1-O5 | 115.12(9)  |
| O4-K1-F1 | 114.20(10) | O3-K1-F1 | 99.67(7)   |
| O4-K1-F5 | 173.15(15) | O3-K1-F5 | 113.53(14) |
| O5-K1-F1 | 119.20(9)  | O5-K1-F5 | 128.09(13) |

**Table S4** Selected bond lengths (Å) and bond angles (°) for **3**

|            |            |            |            |
|------------|------------|------------|------------|
| Cs1-O1     | 3.370(5)   | Cs1-O4     | 3.190(5)   |
| Cs1-O2     | 3.287(6)   | Cs1-O5     | 3.345(5)   |
| Cs1-O3     | 3.088(5)   |            |            |
| O1-Cs1-O2  | 51.61(12)  | O2-Cs1-O3  | 50.57(15)  |
| O1-Cs1-O3  | 98.84(15)  | O2-Cs1-O4  | 90.24(17)  |
| O1-Cs1-O4  | 108.62(15) | O2-Cs1-O5  | 89.50(17)  |
| O1-Cs1-O5  | 69.09(14)  | O2-Cs1-O2A | 180.0      |
| O1-Cs1-O1A | 180.0      | O2-Cs1-O3A | 129.43(15) |
| O1-Cs1-O2A | 128.39(12) | O2-Cs1-O4A | 89.76(17)  |
| O1-Cs1-O3A | 81.16(15)  | O2-Cs1-O5A | 90.50(17)  |
| O1-Cs1-O4A | 71.38(15)  | O3-Cs1-O4  | 54.54(16)  |
| O1-Cs1-O5A | 110.92(14) | O3-Cs1-O5  | 90.85(15)  |
| O4-Cs1-O5  | 50.49(13)  | O3-Cs1-O3A | 180.0      |
| O4-Cs1-O4A | 180.0      | O3-Cs1-O4A | 125.46(16) |
| O4-Cs1-O5A | 129.51(14) | O3-Cs1-O5A | 89.15(15)  |
| O5-Cs1-O5A | 180.0      |            |            |

Symmetry operations: (A)  $-x, -y+1, -z+1$

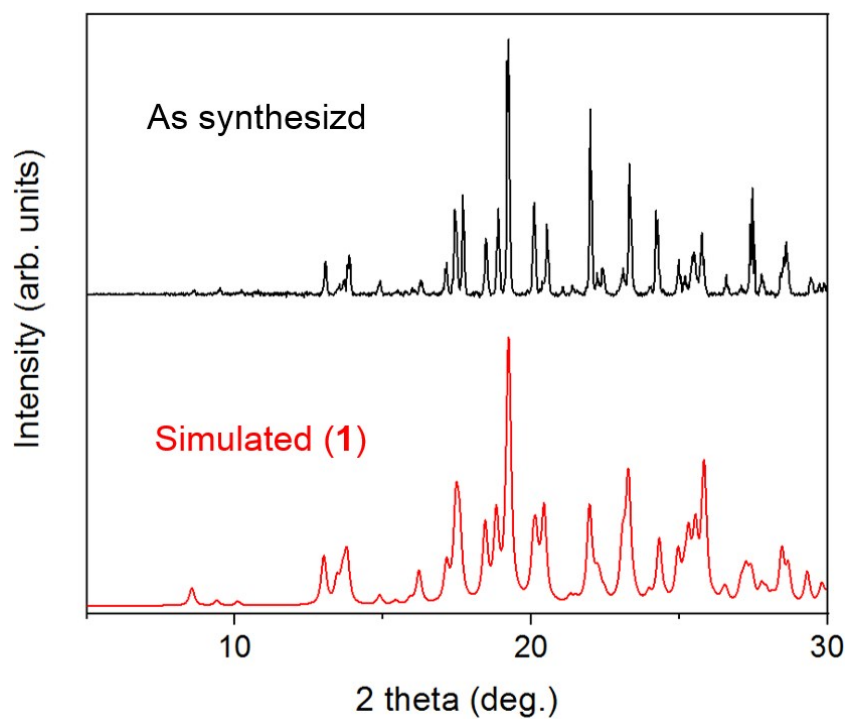

**Fig. S1** PXRd patterns of **1**.

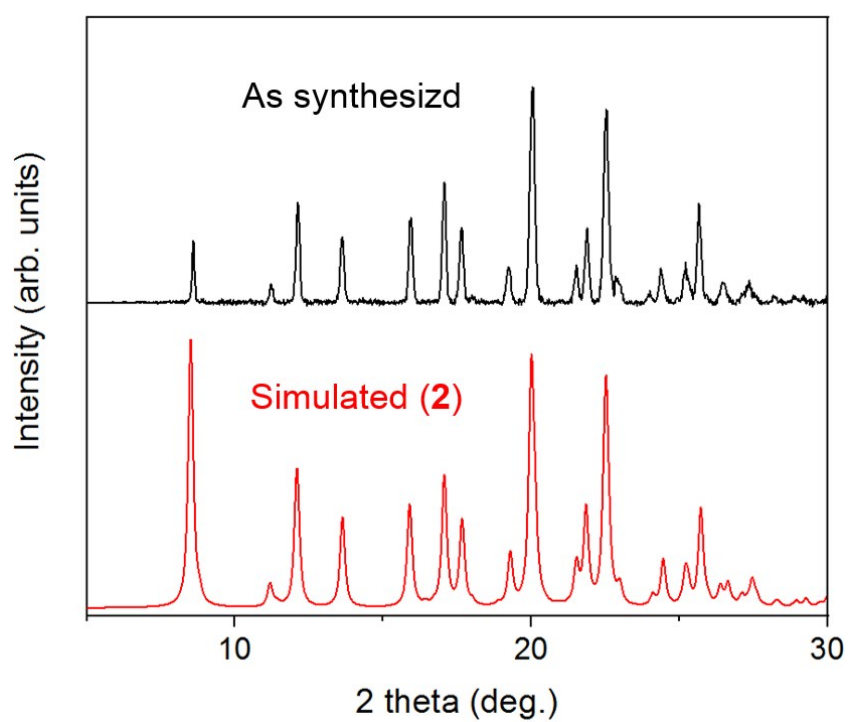

**Fig. S2** PXRd patterns of **2**.

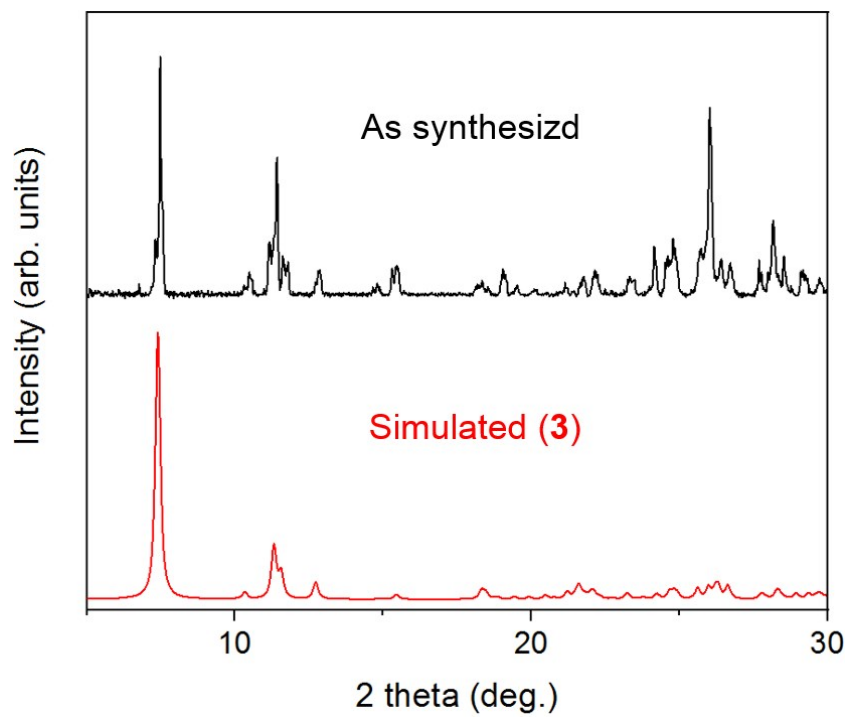

**Fig. S3** PXRd patterns of **3**.

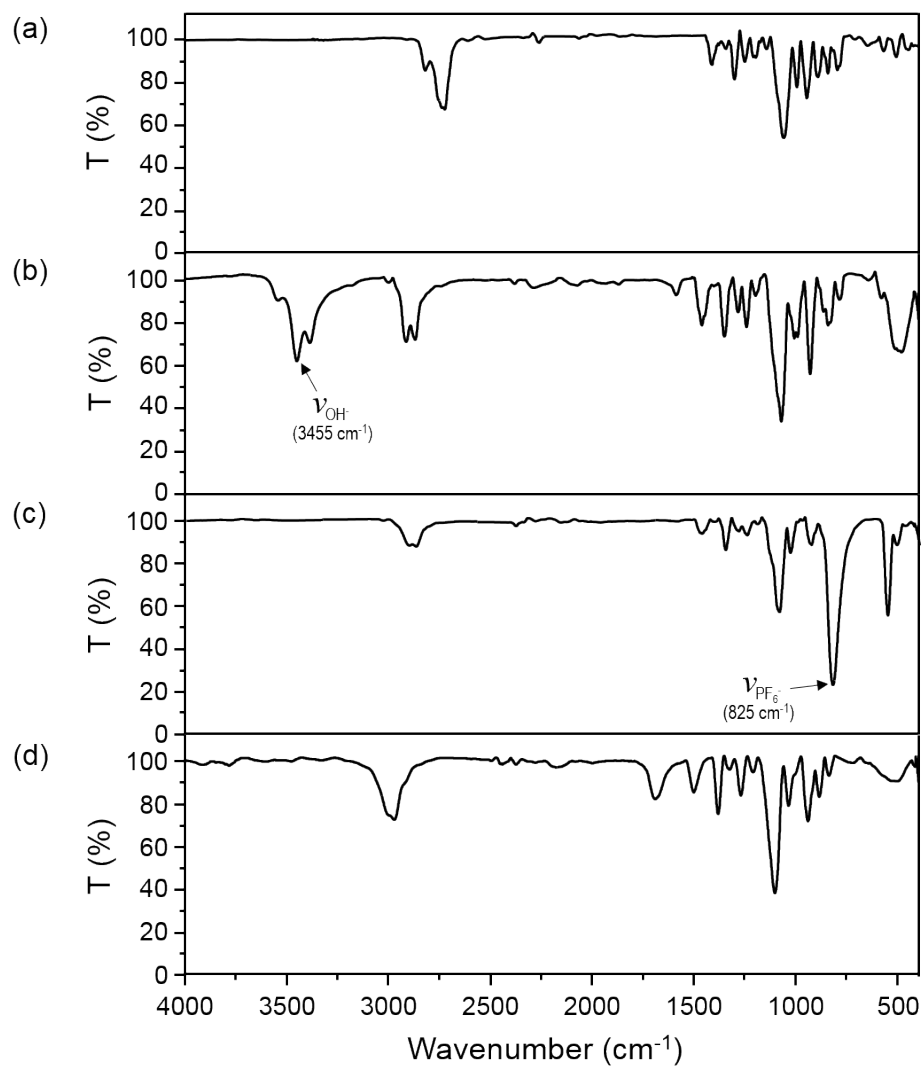

**Fig. S4** IR spectra of (a) **L**, (b) **1**, (c) **2** and (d) **3**.

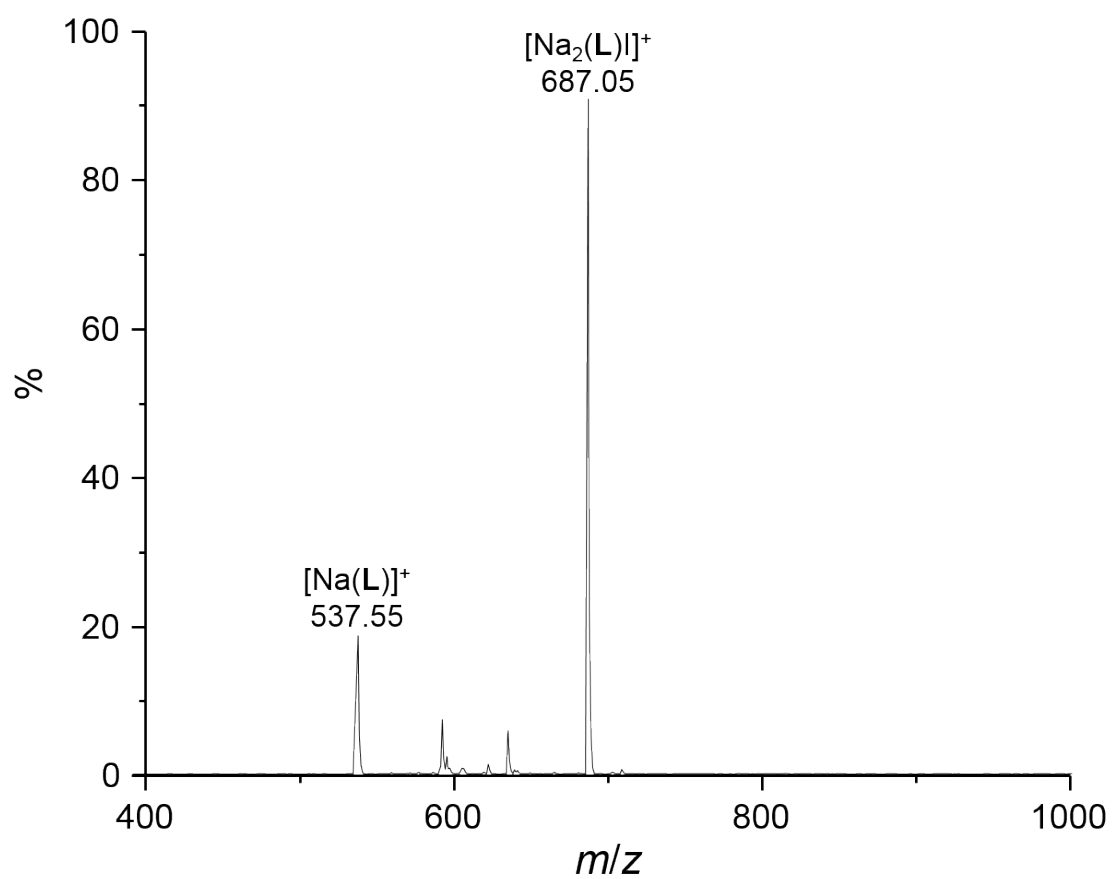

**Fig. S5** ESI-mass spectrum of **1**.



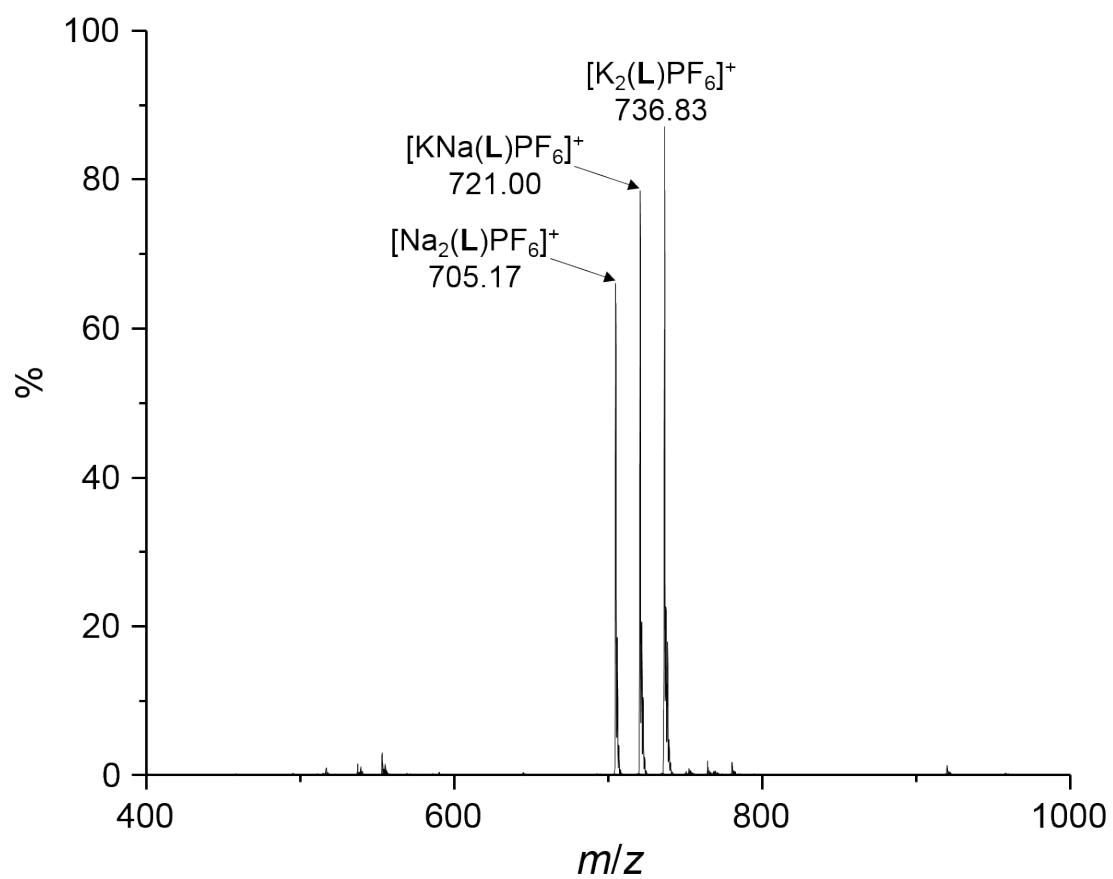

**Fig. S6** ESI-mass spectrum of **2**. The sodium ions bound to the ligand **L** are derived from the glass flasks.

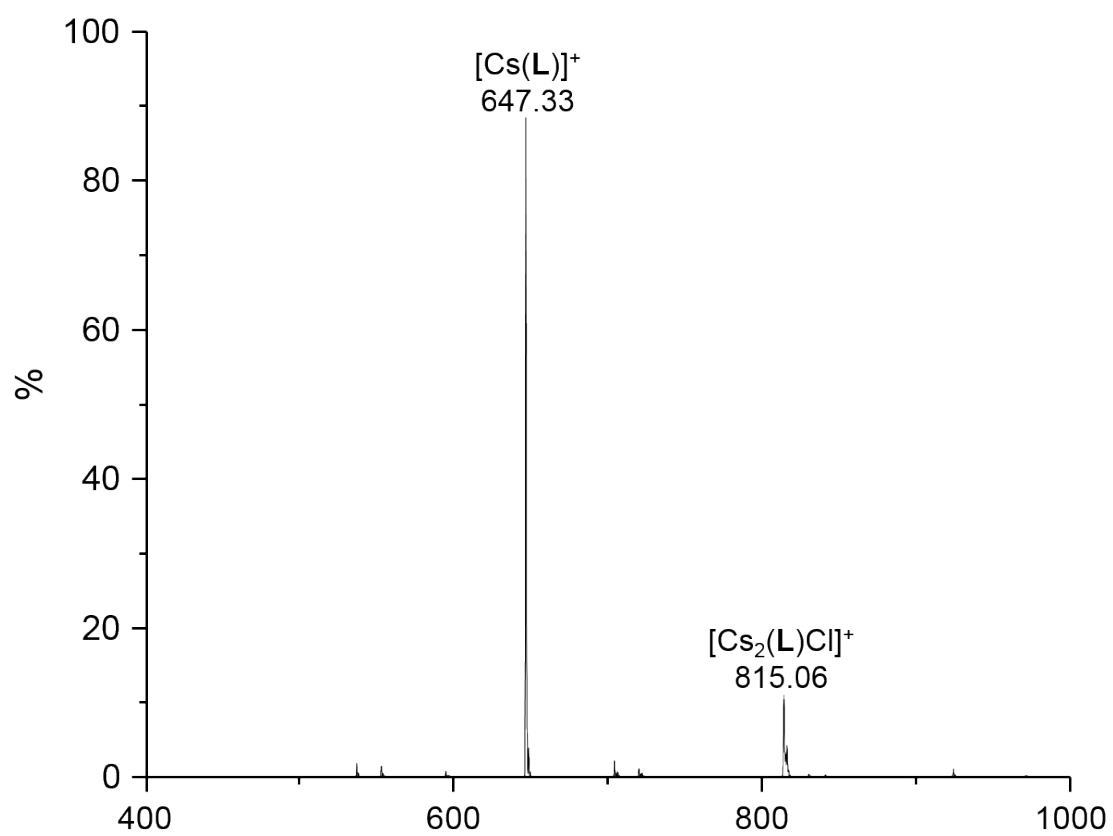

**Fig. S7** ESI-mass spectrum of **3**.

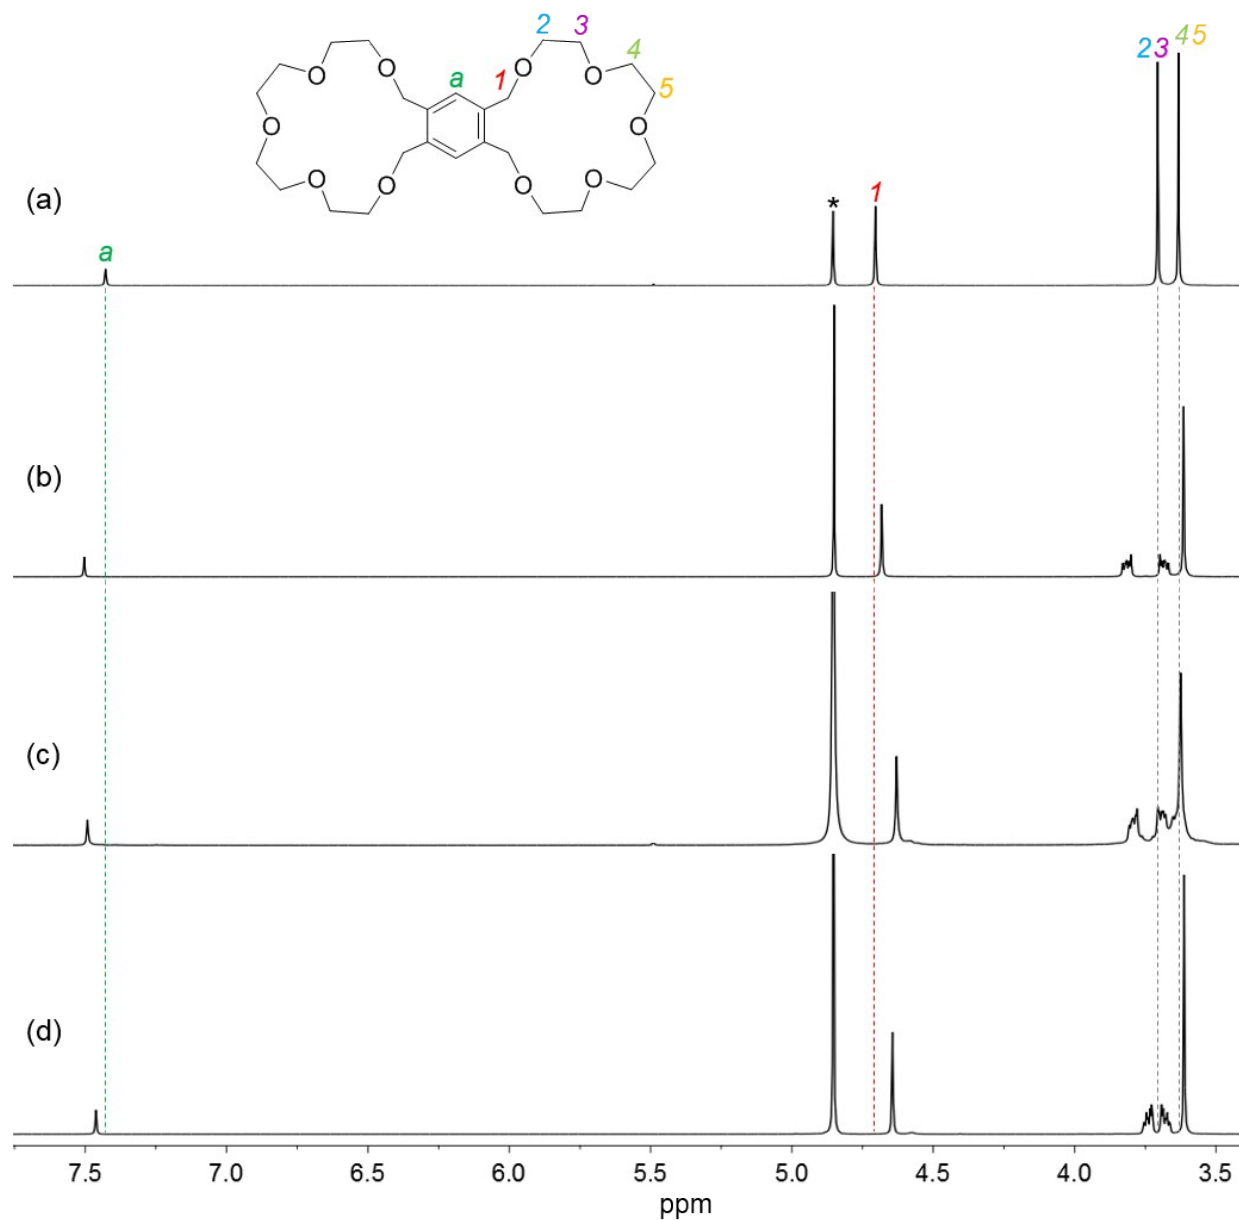

**Fig. S8**  $^1\text{H-NMR}$  spectra of (a) **L**, (b) **1**, (c) **2** and (d) **3** in  $\text{CH}_3\text{OD}$ .
